# Supplementary material
Source: publisher figshare collection journal article supplement (https://sage.figshare.com/ndownloader/files/16798943)
Supplement: Supplementary file 1 [file 16798943]

## Supplementary Tables.

### Supplementary Table 1.

**Summary of 5 published case series of relapse rates after assisted reproductive technology (ART) in women with multiple sclerosis.**

| Location                    | Design                      | Subjects, cycles                                                           | DMT cessation                                                                       | Findings                                                                                                                                                            | Notes                                                                                                                                                                                                                            |
|-----------------------------|-----------------------------|----------------------------------------------------------------------------|-------------------------------------------------------------------------------------|---------------------------------------------------------------------------------------------------------------------------------------------------------------------|----------------------------------------------------------------------------------------------------------------------------------------------------------------------------------------------------------------------------------|
| France Study 1 <sup>8</sup> | Single center retrospective | 4 patients undergoing 6 IVF cycles, and 2 patients undergoing 4 IVF cycles | >1Y prior                                                                           | Increased ARR in the 3 months after IVF (2.4+/- 2.8) vs. the 3 months (0 relapses) or 12 months (0.5+/- 1.2) before IVF, or the 12 months after IVF (0.4+/-1.2).    | Increased ARR was more prominent in the patients undergoing treatment with GnRH agonists (6) vs. antagonists (4).                                                                                                                |
| France Study 2 <sup>9</sup> | Multicenter retrospective   | 32 patients undergoing 70 IVF cycles                                       | 18 never used, 10 average discontinuation of 19 months prior, 4 continued treatment | Increased ARR in the 3 months post-IVF ( $1.60 \pm 2.40$ ) vs. the 3 months prior to IVF ( $0.80 \pm 1.61$ ) or the control period 1 year prior ( $0.68 \pm 1.51$ ) | Increased ARR 3 months post-IVF in cases of failure vs. in cases leading to pregnancy. In cases using GnRH antagonist, the pregnancy rate was lower (10% vs. 40%), but was not associated with increased ARR 3 months post- IVF, |

|                                      |                                          |                                                                                                          |                  |                                                                                                                                                                                                                              |                                                                                                                                                                                                                         |
|--------------------------------------|------------------------------------------|----------------------------------------------------------------------------------------------------------|------------------|------------------------------------------------------------------------------------------------------------------------------------------------------------------------------------------------------------------------------|-------------------------------------------------------------------------------------------------------------------------------------------------------------------------------------------------------------------------|
|                                      |                                          |                                                                                                          |                  |                                                                                                                                                                                                                              | while there was an increased ARR in cases using GnRH agonists ( $1.60 \pm 2.29$ 3 months post) vs. GnRH antagonists ( $0.75 \pm 1.58$ 3 months prior)                                                                   |
| <b>Germany Study 1</b> <sup>10</sup> | Nationwide retrospective                 | 6 patients undergoing 14 ART cycles (5 IVF and 9 ICSI)                                                   |                  | Significant increase in ARR 3 months post-ART ( $1.02 \pm 0.86$ ), as compared to 12 months pre-ART ( $0.29 \pm 0.26$ ). ARR increase was not dependent on gonadotropin used                                                 | 5/6 subjects relapsed within 3 months post-ART                                                                                                                                                                          |
| <b>Germany Study 2</b> <sup>11</sup> | Nationwide prospective and retrospective | 14 prospective and 9 retrospective undergoing 78 cycles (32 IUI, 15 IVF, 31 ICSI)                        |                  | Increased ARR in the 3 months post-ART ( $0.95 \pm 0.12$ ), compared to the 12 months pre-ART ( $0.62 \pm 0.1$ ). This increase was independent of gonadotropin used                                                         | IUI was associated with the greatest increase in ARR, with no effect of gonadotropin or time between stimulations. None of the 14 women who became pregnant experienced a relapse                                       |
| <b>Argentina</b> <sup>12</sup>       | Single center prospective                | 16 RRMS patients undergoing 26 ART cycles. All cycles used GnRH agonists, rFSH, and vaginal progesterone | $\geq 15$ months | 7-fold increased risk of relapses in the 3 months post-ART (75% patients, 58% cycles vs. 0% patients in the 9 months prior), and an increased ARR (3.28 at 3 months post vs. 0.42 in the 12 months prior and 9 months after) | 9-fold increased risk of MRI activity, ( $1.99 \pm 0.3$ new or enlarging T2 lesions 3 months post-ART) vs. ( $0.36 \pm 0.2$ T2 lesions and $0.23 \pm 0.1$ Gd-enhancing lesions during the remaining observation period) |

## Supplementary Table 2.

**Demographic and clinical characteristics of a cohort of 12 women who contributed 22 Assisted Reproductive Technology (ART) cycles for the analyses.**

| BOSTON cohort                           | Descriptive statistics of cohort |
|-----------------------------------------|----------------------------------|
| <b>Subjects:</b>                        |                                  |
| Age                                     | 35.1 $\pm$ 3.60 (26,41)          |
| Subjects; cycles                        | 12; 22                           |
| Subjects contributing more than 1 cycle | 50% (n=6 of 12 subjects)         |
| <b>DMT:</b>                             |                                  |
| Use before ART                          | 63.6% (n=14 of 22 cycles)        |
| Cessation before ART                    | 100% (n=14 of 14 cycles)         |
| Cessation time before ART               | 5.36 $\pm$ 4.41 months (0,12)    |
| <b>Parity:</b>                          |                                  |
| Nulliparity                             | 63.6% (n=14 of 22 cycles)        |
| Single                                  | 36.4% (n=8 of 22 cycles)         |
| <b>ART protocol:</b>                    |                                  |
| GnRH agonist                            | 31.8% (n=7 of 22 cycles)         |
| GnRH antagonist                         | 9.09% (n=2 of 22 cycles)         |
| Other                                   | 59.1% (n=13 of 22 cycles)        |
| <b>Disease:</b>                         |                                  |
| RRMS                                    | 83.3% (n=10 of 12 patients)      |
| CIS                                     | 16.7% (n=2 of 12 patients)       |
| <b>ART outcome:</b>                     |                                  |
| No pregnancy                            | 54.5% (n=12 of 22 cycles)        |
| Term pregnancy                          | 27.3% (n=6 of 22 cycles)         |
| Miscarriage                             | 4.55% (n=1 of 22 cycles)         |
| Other                                   | 13.6% (n=3 of 22 cycles)         |

### Supplementary Table 3.

**Differences in the relapse count during the 3-month period before and after ART, in several stratified groups, in participants from Boston (12 participants, 22 cycles).**

| <b>All ART</b>                                  | <b>Coefficient</b> | <b>SE</b> | <b>p-value</b> |
|-------------------------------------------------|--------------------|-----------|----------------|
| Intercept                                       | -1.73              | 4.58      | 0.71           |
| 3 months before vs. after ART                   | -1.10              | 1.15      | 0.34           |
| Age at ART (years)                              | 0.04               | 0.14      | 0.78           |
| Disease duration (years)                        | -0.53              | 0.34      | 0.12           |
| <b>ART failure</b>                              |                    |           |                |
| Intercept                                       | -9.31              | 10.40     | 0.37           |
| 3 months before vs. after ART                   | -0.69              | 1.22      | 0.57           |
| Age at ART (years)                              | 0.25               | 0.29      | 0.39           |
| Disease duration (years)                        | -0.53              | 0.33      | 0.10           |
| <b>GnRH agonists</b>                            |                    |           |                |
| Intercept                                       | -2.68              | 9.06      | 0.77           |
| 3 months before vs. after ART                   | -0.69              | 1.22      | 0.57           |
| Age at ART (years)                              | 0.07               | 0.25      | 0.77           |
| Disease duration (years)                        | -0.36              | 0.26      | 0.17           |
| <b>Non-parity</b>                               |                    |           |                |
| Intercept                                       | -1.68              | 4.59      | 0.71           |
| 3 months before vs. after ART                   | -1.10              | 1.15      | 0.34           |
| Age at ART (years)                              | 0.04               | 0.14      | 0.80           |
| Disease duration (years)                        | -0.46              | 0.35      | 0.19           |
| <b>No DMT before ART</b>                        |                    |           |                |
| Intercept                                       | -1.29              | 4.73      | 0.79           |
| 3 months before vs. after ART                   | -1.10              | 1.15      | 0.34           |
| Age at ART (years)                              | 0.02               | 0.14      | 0.89           |
| Disease duration (years)                        | -0.22              | 0.36      | 0.53           |
| <b>DMT started more than 3 months after ART</b> |                    |           |                |
| Intercept                                       | -0.19              | 4.00      | 0.96           |
| 3 months before vs. after ART                   | -0.69              | 1.22      | 0.57           |
| Age at ART (years)                              | -0.01              | 0.12      | 0.97           |
| Disease duration (years)                        | -0.85              | 0.91      | 0.35           |

The analysis was performed with a mixed Poisson regression model, adjusted for the age at ART and disease duration at ART (modeled as fixed effects). Repetition of observations on the subject-level was modeled by random effect.

The coefficients represent the mean differences in the logarithm of the relapse count. Stratified groups with zero or near-zero variance in relapse count that could not be fitted to the Poisson regression model are excluded.

#### Supplementary Table 4.

**Participants from Boston, France<sup>9</sup>, Germany<sup>11</sup> and Argentina<sup>12</sup>: Differences between the ARR during the 1-year period before and 3-month period after ART, in several stratified groups.**

| <b>All ART</b>                          | <b>Coefficient</b> | <b>SE</b> | <b>p-value</b> |
|-----------------------------------------|--------------------|-----------|----------------|
| Intercept                               | -0.27              | 0.59      | 0.65           |
| 1 year before vs. 3 months after ART    | 1.31               | 0.08      | 3.6e-64        |
| Age at ART (years)                      | -0.01              | 0.01      | 0.31           |
| Disease duration (years)                | -0.02              | 0.01      | 0.12           |
| <b>ART failure</b>                      |                    |           |                |
| Intercept                               | -0.09              | 0.54      | 0.86           |
| 1 year before vs. 3 months after ART    | 1.37               | 0.09      | 1.4e-52        |
| Age at ART (years)                      | -0.01              | 0.01      | 0.33           |
| Disease duration (years)                | -0.02              | 0.01      | 0.23           |
| <b>ART success</b>                      |                    |           |                |
| Intercept                               | -0.55              | 0.99      | 0.58           |
| 1 year before vs. 3 months after ART    | 1.25               | 0.16      | 1.52e-14       |
| Age at ART (years)                      | -0.01              | 0.02      | 0.66           |
| Disease duration (years)                | -0.04              | 0.03      | 0.20           |
| <b>GnRH agonists</b>                    |                    |           |                |
| Intercept                               | -0.73              | 0.88      | 0.41           |
| 1 year before vs. 3 months after ART    | 1.35               | 0.11      | 2.12e-35       |
| Age at ART (years)                      | 0.02               | 0.02      | 0.50           |
| Disease duration (years)                | -0.06              | 0.03      | 0.02           |
| <b>GnRH antagonists</b>                 |                    |           |                |
| Intercept                               | -1.09              | 4.22e-03  | 0.00e+00       |
| 1 year before vs. 3 months after ART    | 1.15               | 4.22e-03  | 0.00e+00       |
| Age at ART (years)                      | 6.95e-05           | 4.00e-03  | 0.99           |
| Disease duration (years)                | 0.02               | 4.17e-03  | 1.11e-05       |
| <b>Neither agonists nor antagonists</b> |                    |           |                |
| Intercept                               | -1.13              | 1.59      | 0.48           |
| 1 year before vs. 3 months after ART    | 1.33               | 0.13      | 2.17e-23       |
| Age at ART (years)                      | -0.01              | 0.01      | 0.66           |
| Disease duration (years)                | -0.01              | 0.03      | 0.78           |

The analysis was performed with a mixed Poisson regression model, adjusted for the age at ART and disease duration at ART (modeled as fixed effects). Repetition of observations on the subject-level and site-level was modeled by random effects.

The coefficients represent the mean differences in the logarithm of the relapse count.

**Supplementary Table 5.**

**Comparison of annualized relapse rate (ARR) in participants from Boston, France<sup>9</sup> and Argentina<sup>12</sup> in the 3-month period after ART, before ART, and 1 year before ART, in stratified groups.**

| GROUP                               | N         | 1 year before ART (ARR) |          |            | 3 months after ART (ARR) |          |            | p-value         |
|-------------------------------------|-----------|-------------------------|----------|------------|--------------------------|----------|------------|-----------------|
|                                     |           | Mean                    | Median   | Range      | Mean                     | Median   | Range      |                 |
| <b>ALL CYCLES</b>                   | <b>76</b> | <b>0.51</b>             | <b>0</b> | <b>0-6</b> | <b>1.84</b>              | <b>0</b> | <b>0-8</b> | <b>1.02e-04</b> |
| <b>ART Outcome:</b>                 |           |                         |          |            |                          |          |            |                 |
| • Failure                           | 42        | 0.43                    | 0        | 0-6        | 2.48                     | 0        | 0-8        | <b>1.50e-04</b> |
| • Success                           | 30        | 0.43                    | 0        | 0-3        | 1.07                     | 0        | 0-8        | 0.16            |
| <b>ART Protocol:</b>                |           |                         |          |            |                          |          |            |                 |
| • GnRH agonists                     | 57        | 0.56                    | 0        | 0-6        | 2.39                     | 0        | 0-8        | <b>3.91e-05</b> |
| • GnRH antagonists                  | 6         | 0.83                    | 0.5      | 0-3        | 0.67                     | 0        | 0-4        | 1.00            |
| • Other                             | 13        | 0.15                    | 0        | 0-1        | 0.00                     | 0        | 0-0        | 0.35            |
| <b>Parity:</b>                      |           |                         |          |            |                          |          |            |                 |
| • Parous                            | 8         | 0.00                    | 0        | 0-0        | 0.00                     | 0        | 0-0        | NaN             |
| • Nulliparous                       | 40        | 0.28                    | 0        | 0-2        | 2.20                     | 0        | 0-8        | <b>1.07e-03</b> |
| <b>DMT:</b>                         |           |                         |          |            |                          |          |            |                 |
| <i>Prior to ART:</i>                |           |                         |          |            |                          |          |            |                 |
| • No DMT before ART                 | 36        | 0.53                    | 0        | 0-3        | 2.22                     | 0        | 0-8        | <b>0.01</b>     |
| • DMT stopped >3 months before ART  | 43        | 0.47                    | 0        | 0-6        | 2.33                     | 0        | 0-8        | <b>2.92e-04</b> |
| • DMT stopped < 3 months before ART | 3         | 0.00                    | 0        | 0-0        | 0.00                     | 0        | 0-0        | NaN             |
| <i>Following ART:</i>               |           |                         |          |            |                          |          |            |                 |
| • No DMT after ART                  | 35        | 0.63                    | 0        | 0-3        | 1.14                     | 0        | 0-8        | 0.16            |
| • DMT started >3 months after ART   | 28        | 0.39                    | 0        | 0-2        | 1.14                     | 0        | 0-8        | 0.14            |
| • DMT started < 3 months after ART  | 11        | 0.55                    | 0        | 0-6        | 5.82                     | 8        | 0-8        | <b>5.00e-03</b> |

**Supplementary Table 6.**

**Effect of ART on relapse rate in participants from Boston, France<sup>9</sup> and Argentina<sup>12</sup>.**  
Differences between **the relapse count** during the 3-month period before and after ART, in several stratified groups.

| <b>All ART</b>                             | Coefficient | SE    | p-value         |
|--------------------------------------------|-------------|-------|-----------------|
| Intercept                                  | -2.06       | 1.48  | 0.16            |
| 3 months before vs. after ART              | 1.48        | 0.39  | <b>1.49e-04</b> |
| Age at ART (years)                         | 0.01        | 0.04  | 0.84            |
| Disease duration (years)                   | -0.12       | 0.05  | <b>0.03</b>     |
| <b>ART failure</b>                         |             |       |                 |
| Intercept                                  | -2.18       | 2.09  | 0.30            |
| 3 months before vs. after ART              | 1.65        | 0.48  | <b>6.45e-04</b> |
| Age at ART (years)                         | 0.02        | 0.06  | 0.79            |
| Disease duration (years)                   | -0.12       | 0.07  | 0.07            |
| <b>ART success</b>                         |             |       |                 |
| Intercept                                  | -1.23       | 2.51  | 0.62            |
| 3 months before vs. after ART              | 1.39        | 0.79  | 0.08            |
| Age at ART (years)                         | -0.01       | 0.08  | 0.89            |
| Disease duration (years)                   | -0.27       | 0.15  | 0.06            |
| <b>GnRH agonists</b>                       |             |       |                 |
| Intercept                                  | -2.12       | 1.44  | 0.14            |
| 3 months before vs. after ART              | 1.73        | 0.44  | <b>8.96e-05</b> |
| Age at ART (years)                         | 0.01        | 0.04  | 0.76            |
| Disease duration (years)                   | -0.12       | 0.06  | 0.05            |
| <b>GnRH antagonists</b>                    |             |       |                 |
| Intercept                                  | -3.93       | 10.57 | 0.71            |
| 3 months before vs. after ART              | 1.24e-15    | 1.41  | 1.00            |
| Age at ART (years)                         | 0.02        | 0.32  | 0.94            |
| Disease duration (years)                   | 0.12        | 0.18  | 0.49            |
| <b>Nulliparous</b>                         |             |       |                 |
| Intercept                                  | -0.81       | 1.99  | 0.69            |
| 3 months before vs. after ART              | 1.99        | 0.61  | <b>1.13e-03</b> |
| Age at ART (years)                         | -0.04       | 0.06  | 0.47            |
| Disease duration (years)                   | -0.14       | 0.11  | 0.22            |
| <b>No DMT before ART</b>                   |             |       |                 |
| Intercept                                  | -2.67       | 1.82  | 0.14            |
| 3 months before vs. after ART              | 1.61        | 0.54  | <b>2.92e-03</b> |
| Age at ART (years)                         | 0.03        | 0.05  | 0.59            |
| Disease duration (years)                   | -0.14       | 0.09  | 0.13            |
| <b>DMT stopped &gt;3 months before ART</b> |             |       |                 |
| Intercept                                  | -0.32       | 2.22  | 0.89            |
| 3 months before vs. after ART              | 1.83        | 0.53  | <b>5.89e-04</b> |

|                                              |       |      |             |
|----------------------------------------------|-------|------|-------------|
| Age at ART (years)                           | -0.04 | 0.06 | 0.50        |
| Disease duration (years)                     | -0.14 | 0.10 | 0.15        |
| <b>No DMT after ART</b>                      |       |      |             |
| Intercept                                    | -1.22 | 2.57 | 0.63        |
| 3 months before vs. after ART                | 0.92  | 0.59 | 0.12        |
| Age at ART (years)                           | -0.02 | 0.08 | 0.83        |
| Disease duration (years)                     | -0.10 | 0.08 | 0.24        |
| <b>DMT started &gt;3 months after ART</b>    |       |      |             |
| Intercept                                    | -3.39 | 2.58 | 0.19        |
| 3 months before vs. after ART                | 1.39  | 0.79 | 0.08        |
| Age at ART (years)                           | 0.05  | 0.08 | 0.53        |
| Disease duration (years)                     | -0.05 | 0.10 | 0.07        |
| <b>DMT started within 3 months after ART</b> |       |      |             |
| Intercept                                    | 5.78  | 4.07 | 0.16        |
| 3 months before vs. after ART                | 2.08  | 0.75 | <b>0.01</b> |
| Age at ART (years)                           | -0.17 | 0.10 | 0.09        |
| Disease duration (years)                     | -0.45 | 0.31 | 0.15        |

The analysis was performed with a mixed Poisson regression model, adjusted for the age at ART and disease duration at ART (modeled as fixed effects). Repetition of observations on the subject level and site level was modeled by random effects.

The coefficients represent the mean differences in the logarithm of the relapse count. Stratified groups with zero or near-zero variance in relapse count that could not be fitted to the Poisson regression model are excluded.

Abbreviations. ARR = annualized relapse rate. ART = assisted reproductive technology. DMT = disease modifying therapy.
